# Supplementary material for: Soy, Rice and Oat Drinks: Investigating Chemical and Biological Safety in Plant-Based Milk Alternatives
Source: MDPI journal article supplement (doi:10.3390/nu15102258), 2023-05-10
Supplement: s1 [file s1]

**Supplementary Material****Table S1.** Pesticides transition. Pesticides name, parent ion (m/z), quantitative and qualitative ion (m/z), collision energy CE (V).

| Pesticide       | Parent Ion (m/z) | Quantitation and Qualification Ions (m/z) | Collision Energy (V) |
|-----------------|------------------|-------------------------------------------|----------------------|
| Dichlorvos      | 185              | 93.1                                      | 10                   |
|                 | 109              | 79                                        | 5                    |
| Biphenyl        | 154.1            | 152.1                                     | 25                   |
|                 | 154.1            | 153.1                                     | 10                   |
| Methacrifos     | 125              | 47.1                                      | 10                   |
|                 | 208              | 180.1                                     | 5                    |
| 2-Phenylphenol  | 170.1            | 169.1                                     | 10                   |
|                 | 169.1            | 141.1                                     | 10                   |
| Diphenylamine   | 168.2            | 167.1                                     | 15                   |
|                 | 169.2            | 168.2                                     | 10                   |
| Chlorpropham    | 213.1            | 127.1                                     | 10                   |
|                 | 213.1            | 171.1                                     | 5                    |
| Trifluralin     | 306.1            | 264.1                                     | 5                    |
|                 | 306.1            | 206.1                                     | 10                   |
| Cadusafos       | 159              | 97                                        | 15                   |
|                 | 159              | 131                                       | 5                    |
| Phosmet         | 160.1            | 77.1                                      | 20                   |
|                 | 160.1            | 51.1                                      | 35                   |
| $\alpha$ -HCH   | 181              | 145                                       | 15                   |
|                 | 218.9            | 183                                       | 5                    |
| HCB             | 283.8            | 248.9                                     | 15                   |
|                 | 283.8            | 213.9                                     | 30                   |
| Aldrin          | 262.8            | 193                                       | 30                   |
|                 | 262.8            | 191                                       | 30                   |
| Fenthion        | 278              | 109.1                                     | 15                   |
|                 | 278              | 169.1                                     | 15                   |
| Parathion       | 291.1            | 109.1                                     | 10                   |
|                 | 235              | 139.1                                     | 5                    |
| Triadimefon     | 208              | 181.1                                     | 5                    |
|                 | 208              | 127.1                                     | 15                   |
| Isocarbophos    | 230              | 212.1                                     | 10                   |
|                 | 109.9            | 64                                        | 10                   |
| Pirimiphos      | 304.1            | 168.1                                     | 10                   |
|                 | 318.1            | 166.2                                     | 10                   |
| Cyprodinil      | 224.1            | 208.2                                     | 15                   |
|                 | 225.2            | 210.2                                     | 15                   |
| Pendimethalin   | 252.1            | 162.2                                     | 10                   |
|                 | 252.1            | 161.2                                     | 15                   |
| Chlorfenvinphos | 266.9            | 159.1                                     | 15                   |
|                 | 323              | 267                                       | 10                   |
| Oxychlordan     | 386.9            | 263                                       | 10                   |
|                 | 386.9            | 287                                       | 15                   |

|                          |       |       |    |
|--------------------------|-------|-------|----|
| Heptachlor-exo-epoxide   | 352.8 | 262.9 | 10 |
|                          | 354.8 | 264.9 | 10 |
| Phosmet-oxon             | 160   | 133.1 | 10 |
|                          | 160   | 77.1  | 20 |
| p,p'-DDT                 | 235   | 165.1 | 20 |
|                          | 237   | 165.1 | 20 |
| Propargite               | 173.1 | 135.1 | 15 |
|                          | 201.1 | 81.1  | 10 |
| TPP (SI)                 | 325   | 169.1 | 15 |
|                          | 326.1 | 233.1 | 10 |
| Piperonyl-butoxide       | 176.1 | 103.1 | 10 |
|                          | 176.1 | 131.1 | 20 |
| Resmethrin               | 171.1 | 128.1 | 15 |
|                          | 171.1 | 143.1 | 5  |
| Spiromesifen             | 272.1 | 209.2 | 10 |
|                          | 272.1 | 254.2 | 5  |
| Endrin-ketone            | 316.9 | 281   | 5  |
|                          | 245   | 173.1 | 25 |
| Iprodione                | 314.1 | 245.1 | 10 |
|                          | 316.1 | 247.1 | 10 |
| Tetramethrin             | 164.1 | 107.1 | 10 |
|                          | 164.1 | 77.1  | 25 |
| Bifenthrin               | 181.1 | 166.2 | 10 |
|                          | 181.1 | 165.1 | 25 |
| Esfenvalerate            | 125   | 89.1  | 20 |
|                          | 167.1 | 125.1 | 10 |
| Difenoconazole           | 323   | 265.1 | 10 |
|                          | 265   | 139.1 | 35 |
| Desmedipham              | 181.1 | 109.1 | 10 |
|                          | 109.1 | 8.1   | 10 |
| $\beta$ -HCH             | 181   | 145   | 15 |
|                          | 218.9 | 183   | 5  |
| Lindane ( $\gamma$ -HCH) | 181   | 145   | 15 |
|                          | 218.9 | 183   | 5  |
| Diazinon                 | 137.1 | 84.1  | 10 |
|                          | 152.1 | 137.1 | 5  |
| Pyrimethanil             | 198.1 | 118.1 | 30 |
|                          | 198.1 | 182.1 | 20 |
| Chlorothalonil           | 265.8 | 133   | 35 |
|                          | 263.9 | 133   | 35 |
| Paraoxon-methyl          | 230   | 106.1 | 15 |
|                          | 230   | 136.1 | 5  |
| Tefluthrin               | 177   | 127.1 | 15 |
|                          | 177   | 137.1 | 15 |
| Chlorpyrifos-Methyl      | 286,0 | 93.1  | 20 |
|                          | 286   | 271   | 10 |
| Malaoxon                 | 127   | 99.1  | 5  |
|                          | 127   | 109.1 | 10 |
| Metribuzin               | 198.1 | 82.1  | 15 |
|                          | 198.1 | 110.1 | 10 |

|                         |       |       |    |
|-------------------------|-------|-------|----|
| Fipronil                | 366.9 | 213   | 25 |
|                         | 369   | 215   | 25 |
| Heptachlor-endo-epoxide | 217   | 182   | 15 |
|                         | 183   | 155   | 15 |
| Phenthoate              | 274   | 121.1 | 10 |
|                         | 246   | 121.1 | 5  |
| Procymidone             | 283   | 96.1  | 10 |
|                         | 285   | 96.1  | 10 |
| Triadimenol             | 128   | 65.1  | 20 |
|                         | 168.1 | 70.1  | 10 |
| trans-Chlordane         | 372.8 | 266   | 20 |
|                         | 374.8 | 266   | 20 |
| $\alpha$ -Endosulfan    | 241   | 206   | 10 |
|                         | 207   | 172.1 | 10 |
| cis-Chlordane           | 372.8 | 266   | 20 |
|                         | 374.8 | 266   | 20 |
| Mepanipyrin             | 222.2 | 206.2 | 25 |
|                         | 222.2 | 118.2 | 35 |
| Fludioxonil             | 154.1 | 127.1 | 25 |
|                         | 248   | 127.1 | 10 |
| Isoprothiolane          | 162   | 85    | 15 |
|                         | 204.1 | 118.1 | 5  |
| EPN                     | 169   | 77.1  | 20 |
|                         | 169   | 141.1 | 5  |
| Bromopropylate          | 340.9 | 185   | 15 |
|                         | 343   | 185   | 15 |
| Bromuconazole           | 294.9 | 173   | 10 |
|                         | 173   | 109   | 25 |
| Methoxychlor            | 227.1 | 169.1 | 25 |
|                         | 227.1 | 141.1 | 30 |
| Fenpropathrin           | 265.1 | 89.1  | 10 |
|                         | 265.1 | 210.2 | 30 |
| Tebufenpyrad            | 276.1 | 171.1 | 10 |
|                         | 333.2 | 171.1 | 15 |
| Fenazaquin              | 160.2 | 117.1 | 20 |
|                         | 145.1 | 91.1  | 25 |
| Phosalone               | 182   | 75.1  | 30 |
|                         | 182   | 111.1 | 15 |
| $\lambda$ -Cyhalothrin  | 181.1 | 152.1 | 20 |
|                         | 197   | 141.1 | 10 |
| Fenarimol               | 139   | 75.1  | 25 |
|                         | 139   | 111.1 | 15 |
| Acrinathrin             | 208.1 | 181.1 | 5  |
|                         | 181.1 | 152.1 | 20 |
| Deltamethrin            | 252.9 | 172.1 | 5  |
|                         | 252.9 | 93.1  | 15 |
| Azoxystrobin            | 344.1 | 329.2 | 10 |
|                         | 388.1 | 360.2 | 10 |
| Vinclozolin             | 198   | 145   | 15 |
|                         | 187   | 124   | 15 |
| Parathion-methyl        | 263   | 109.1 | 10 |

|                         |       |       |    |
|-------------------------|-------|-------|----|
|                         | 263   | 79.1  | 25 |
| Tolclofos-methyl        | 265   | 250   | 10 |
|                         | 265   | 220   | 20 |
| Metalaxyl               | 206.1 | 132.1 | 15 |
|                         | 160.1 | 130.1 | 15 |
| Heptachlor              | 100   | 65.1  | 10 |
|                         | 271.8 | 236.9 | 10 |
| Pirimiphos-methyl       | 290.1 | 125.1 | 20 |
|                         | 305.1 | 180.2 | 5  |
| Fenitrothion            | 277   | 260.1 | 5  |
|                         | 277   | 109.1 | 15 |
| Malathion               | 173.1 | 127.1 | 5  |
|                         | 173.1 | 99.1  | 10 |
| Metolachlor             | 238.1 | 162.2 | 10 |
|                         | 162.1 | 132.1 | 20 |
| Chlorpyrifos            | 314   | 258   | 10 |
|                         | 316   | 260   | 10 |
| Fenpropimorph           | 128.1 | 70.1  | 10 |
|                         | 303.3 | 128.2 | 5  |
| Profenofos              | 339   | 269   | 10 |
|                         | 337   | 267   | 10 |
| p,p'-DDE                | 246   | 176.1 | 30 |
|                         | 317.9 | 248.1 | 15 |
| Dieldrin                | 276.9 | 241   | 5  |
|                         | 276.9 | 207.1 | 20 |
| Fipronil-sulfone        | 383   | 255.1 | 15 |
|                         | 385   | 257   | 15 |
| Kresoxim-methyl         | 206.1 | 116.1 | 5  |
|                         | 116.1 | 89.1  | 15 |
| Endrin                  | 279   | 243.1 | 10 |
|                         | 281   | 245   | 10 |
| $\beta$ - Endosulfan    | 241   | 206   | 10 |
|                         | 207   | 172.1 | 10 |
| Ethion                  | 231   | 129   | 20 |
|                         | 153   | 97    | 10 |
| Oxadixyl                | 163.1 | 132.1 | 10 |
|                         | 163.1 | 117.1 | 20 |
| p,p'-DDD + o,p'-<br>DDT | 235   | 165.1 | 20 |
|                         | 237   | 165.1 | 20 |
| Endosulfan-sulfate      | 271.8 | 236.9 | 10 |
|                         | 238.8 | 204   | 10 |
| Fluquinconazole         | 340.1 | 298.1 | 10 |
|                         | 340.1 | 108.1 | 35 |
| Permethrin              | 183.1 | 168.1 | 10 |
|                         | 183.1 | 153.1 | 10 |
| Pyridaben               | 147.1 | 117.1 | 20 |
|                         | 147.1 | 132.2 | 10 |
| Cyfluthrin              | 226.1 | 206.1 | 10 |
|                         | 206.1 | 151.2 | 15 |
| Boscalid                | 140   | 112   | 10 |
|                         | 140   | 76.1  | 20 |

|                     |       |       |    |
|---------------------|-------|-------|----|
| Cypermethrin        | 163   | 127.1 | 5  |
|                     | 163   | 91.1  | 10 |
| Bixafen             | 413   | 159.1 | 10 |
|                     | 159   | 139.1 | 10 |
| Flucythrinate       | 157.1 | 107.1 | 10 |
|                     | 199.1 | 157.1 | 5  |
| Etofenprox          | 163.1 | 135.1 | 10 |
|                     | 163.1 | 107.1 | 15 |
| Fenvalerate         | 125   | 89.1  | 20 |
|                     | 167.1 | 125.1 | 10 |
| $\tau$ -Fluvalinate | 250.1 | 200.1 | 15 |
|                     | 250.1 | 55.1  | 15 |

**Table S2:** Validated pesticides LOQs.

| Analita              | LOQ   | Analita                | LOQ   |
|----------------------|-------|------------------------|-------|
| Acrinathrin          | 0.002 | Fluquinconazole        | 0.002 |
| Azoxystrobin         | 0.002 | Heptachlor-exo-epoxide | 0.005 |
| Bifenthrin           | 0.002 | Iprodione              | 0.002 |
| Bixafen              | 0.002 | Isocarbophos           | 0.002 |
| Boscalid             | 0.002 | Isoprothiolane         | 0.002 |
| Bromopropylate       | 0.002 | Kresoxim-methyl        | 0.002 |
| Bromuconazole        | 0.002 | $\lambda$ -Cyhalothrin | 0.002 |
| Chlorfenvinphos      | 0.002 | Malaoxon               | 0.005 |
| Chlorpyrifos         | 0.005 | Malathion              | 0.005 |
| cis-Chlordane        | 0.005 | Mepanipyrim            | 0.005 |
| Cyfluthrin           | 0.002 | Metalaxyl              | 0.005 |
| Cypermethrin         | 0.002 | Methoxychlor           | 0.002 |
| Cyprodinil           | 0.005 | Metolachlor            | 0.005 |
| p,p'-DDD + o,p'-DDT  | 0.004 | Metribuzin             | 0.005 |
| p,p'-DDE             | 0.002 | Oxadixyl               | 0.002 |
| p,p'-DDT             | 0.002 | Paraoxon-methyl        | 0.005 |
| Deltamethrin         | 0.002 | Parathion              | 0.002 |
| Dieldrin             | 0.005 | Pendimethalin          | 0.005 |
| Difenoconazole       | 0.002 | Permethrin             | 0.005 |
| $\alpha$ -Endosulfan | 0.005 | Phenthoate             | 0.002 |
| $\beta$ -Endosulfan  | 0.005 | Phosalone              | 0.002 |
| Endosulfan-sulfate   | 0.002 | Phosmet                | 0.002 |
| Endrin               | 0.005 | Phosmet-oxon           | 0.002 |
| Endrin-ketone        | 0.005 | Piperonil-butoxide     | 0.002 |
| EPN                  | 0.002 | Pirimiphos             | 0.005 |
| Esfenvalerate        | 0.002 | Pirimiphos-methyl      | 0.005 |
| Ethion               | 0.002 | Procymidone            | 0.002 |

|                  |       |                     |       |
|------------------|-------|---------------------|-------|
| Etofenprox       | 0.002 | Profenofos          | 0.002 |
| Fenarimol        | 0.002 | Propargite          | 0.005 |
| Fenazaquin       | 0.005 | Pyridaben           | 0.005 |
| Fenitrothion     | 0.005 | Resmethrin          | 0.002 |
| Fenpropathrin    | 0.002 | Spiromesifen        | 0.002 |
| Fenpropimorph    | 0.005 | $\tau$ -Fluvalinate | 0.002 |
| Fenthion         | 0.005 | Tebufenpyrad        | 0.002 |
| Fenvalerate      | 0.002 | Tetramethrin        | 0.002 |
| Fipronil         | 0.002 | trans-Chlordane     | 0.005 |
| Fipronil-sulfone | 0.002 | Triadimefon         | 0.002 |
| Flucythrinate    | 0.002 | Vinclozolin         | 0.005 |
| Fludioxonil      | 0.002 | $\beta$ -HCH        | 0.005 |

**Table S3:** Declared soy percentage (%) in soy drink.

| n° | Declared soy (%) |
|----|------------------|
| 1  | 6.4              |
| 2  | 6                |
| 3  | 6.4              |
| 4  | 8.7              |
| 5  | 6.3              |
| 6  | 7                |
| 7  | 6.4              |
| 8  | 7.5              |
| 9  | 6                |
| 10 | 6.8              |
| 11 | 6.8              |
| 12 | 5.9              |
| 13 | 7.5              |
| 14 | 8                |
| 15 | 7.2              |
| 16 | 6.7              |
| 17 | 8                |
| 18 | 7.5              |
| 19 | 6.9              |
| 20 | 7.2              |
| 21 | 7.2              |
| 22 | 7.2              |
| 23 | 5.8              |
| 24 | 6.8              |
| 25 | 6.4              |
| 26 | 6.4              |
| 27 | 8                |
| 28 | 6.4              |
| 29 | 6.4              |
| 30 | 6.4              |
| 31 | 6.4              |
| 32 | 6.8              |
| 33 | 8                |

**Table S4:** Declared rice percentage (%) in rice drink.

| n° | Declared rice (%) |
|----|-------------------|
| 1  | 17                |
| 2  | 17                |
| 3  | 16                |
| 4  | 12                |
| 5  | 17                |
| 6  | 17                |
| 7  | 17                |
| 8  | 17                |
| 9  | 17                |
| 10 | 17                |
| 11 | 17                |
| 12 | 17                |
| 13 | 16                |
| 14 | 16                |
| 15 | 17                |
| 16 | 17                |
| 17 | 17                |

**Table S5:** Declared oat percentage (%) in oat drink.

| n° | Declared oat (%) |
|----|------------------|
| 1  | 8                |
| 2  | 11               |
| 3  | 10               |
| 4  | 16               |
| 5  | 14               |
| 6  | 11               |
| 7  | 14               |
| 8  | 10               |
| 9  | 12               |
| 10 | 12               |
